# Supplementary material for: Syntheses, photoluminescence and electroluminescence of two novel platinum(ii) complexes
Source: Royal Society of Chemistry journal article supplement (doi:10.1039/c6dt03991j), 2016-11-15
Supplement: c6dt03991j1.pdf [file c6dt03991j1.pdf]

## Supporting Information

### Syntheses, photoluminescence and electroluminescence of two novel platinum(II) complexes

Guang-Zhao Lu,<sup>a</sup> Yan Li,<sup>a</sup> Yi-Ming Jing,<sup>a</sup> You-Xuan Zheng<sup>a,b,c\*</sup>

<sup>a</sup> State Key Laboratory of Coordination Chemistry, Nanjing National Laboratory of Microstructures, Center for Multimolecular Chemistry, School of Chemistry and Chemical Engineering, Nanjing University, Nanjing 210093, P. R. China, Tel: +86 25 83596775, Fax: +86 25 83314502, e-mail: yxzheng@nju.edu.cn

<sup>b</sup> State Key Laboratory of Luminescence and Applications, Changchun Institute of Optics, Fine Mechanics and Physics, Chinese Academy of Science, Changchun 130033, P. R. China

<sup>c</sup> MaAnShan High-Tech Research Institute of Nanjing University, MaAnShan, 238200, P. R. China

**Fig. S1** <sup>1</sup>H NMR spectrum of **Pt-tpip**.

**Fig. S2** The MALDI-TOF spectrum of **Pt-ftpip**.

**Fig. S3** <sup>1</sup>H NMR spectrum of **Pt-ftpip**.

**Fig. S4** The MALDI-TOF spectrum of **Pt-ftpip**.

**Fig. S5** The atoms' displacement values from the mean plane of **Pt-tpip**.

**Fig. S6** The atoms' displacement values from the mean plane of **Pt-ftpip**.

**Table S1** The crystallographic data of **Pt-tpip** and **Pt-ftpip**.

**Table S2** Selected bond lengths and angles of **Pt-tpip** and **Pt-ftpip**.

**Fig. S7** The Photoluminescence lifetime curves of **Pt-tpip** and **Pt-ftpip** in degassed CH<sub>2</sub>Cl<sub>2</sub> solution.

**Fig. S8** The current density (J) versus voltage (V) curves for G1 and G2.

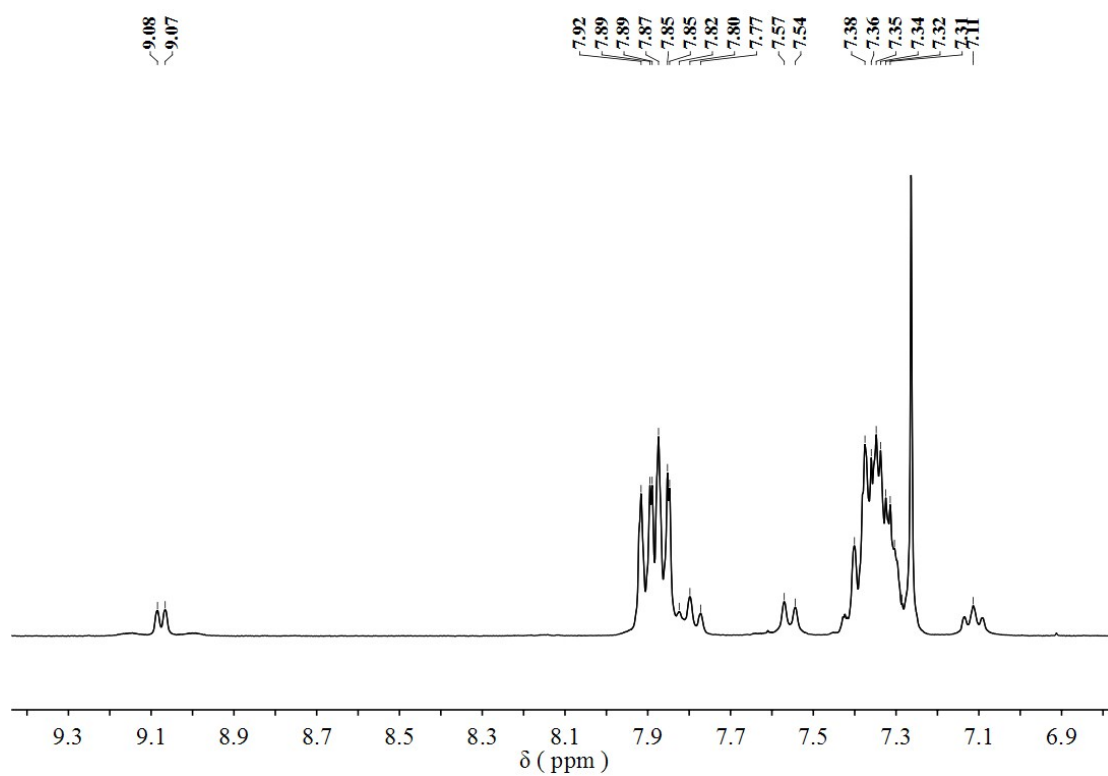

Fig. S1 <sup>1</sup>H NMR spectrum of Pt-tpip.

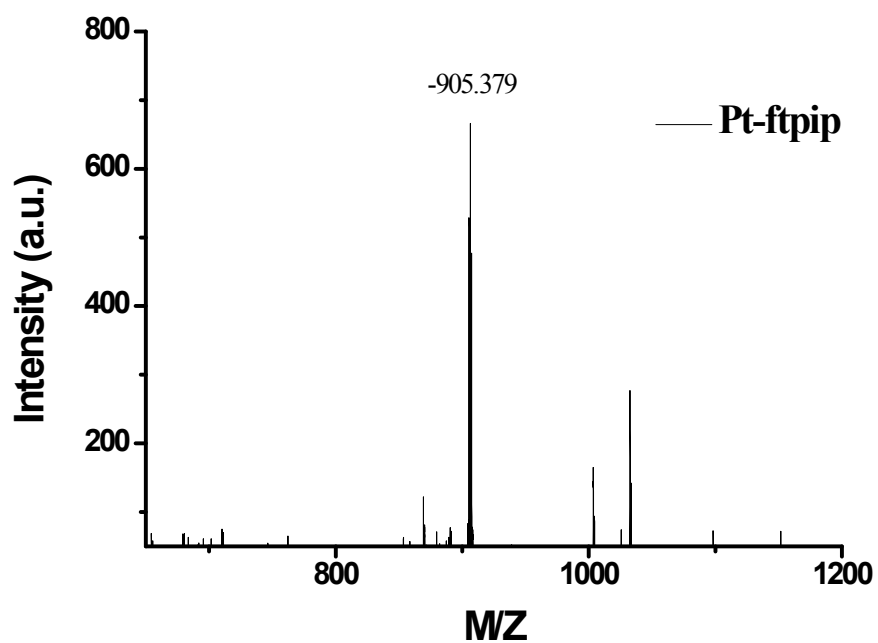

Fig. S2 The MALDI-TOF spectrum of Pt-ftpip.

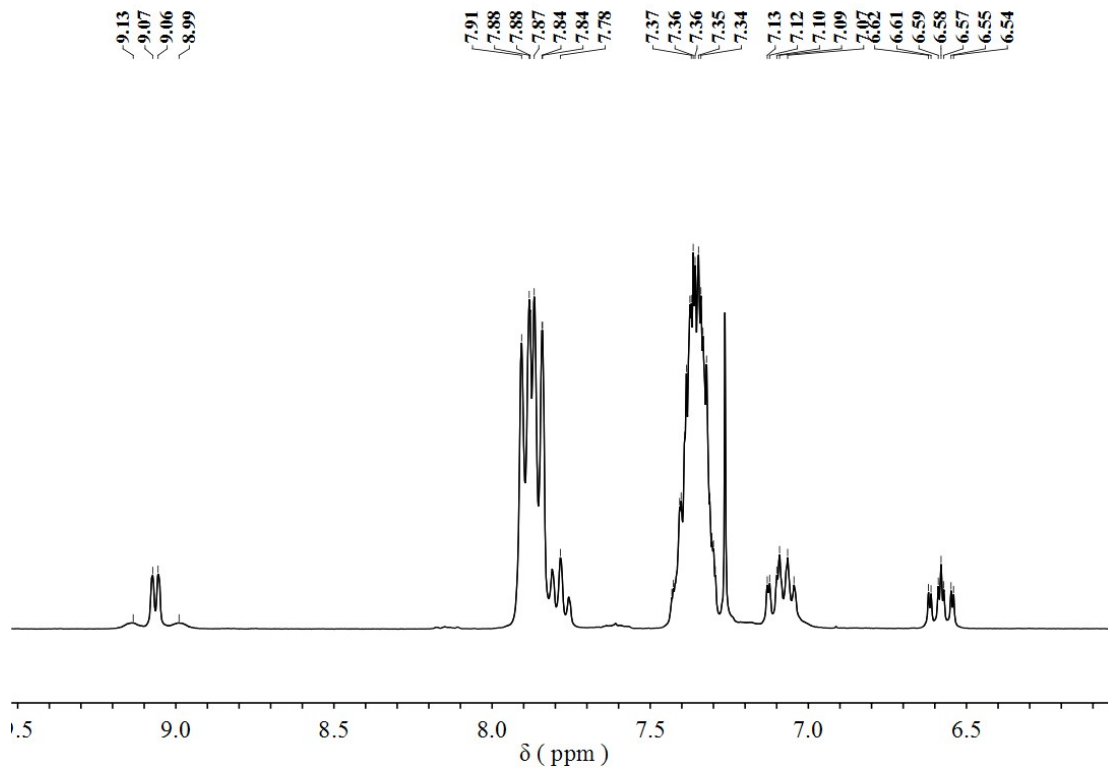

Fig. S3  $^1\text{H}$  NMR spectrum of Pt-ftpip.

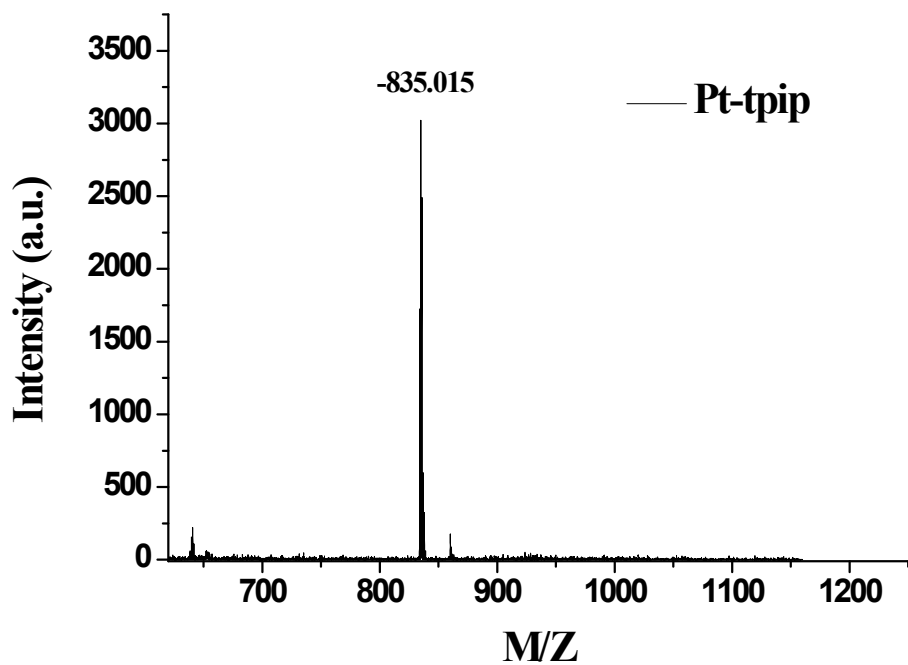

Fig. S4 The MALDI-TOF spectrum of Pt-tpip.

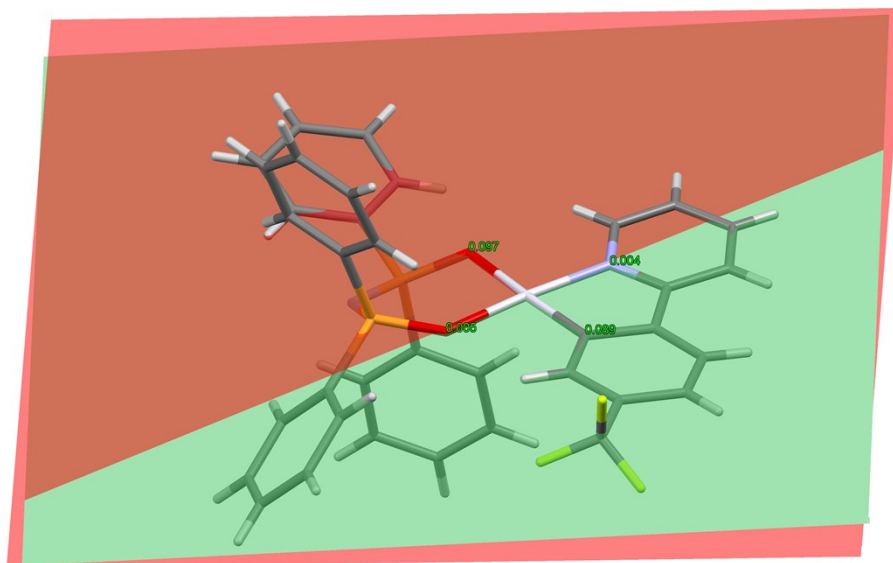

**Fig. S5** The atoms' displacement values from the mean plane of **Pt-tpip**.

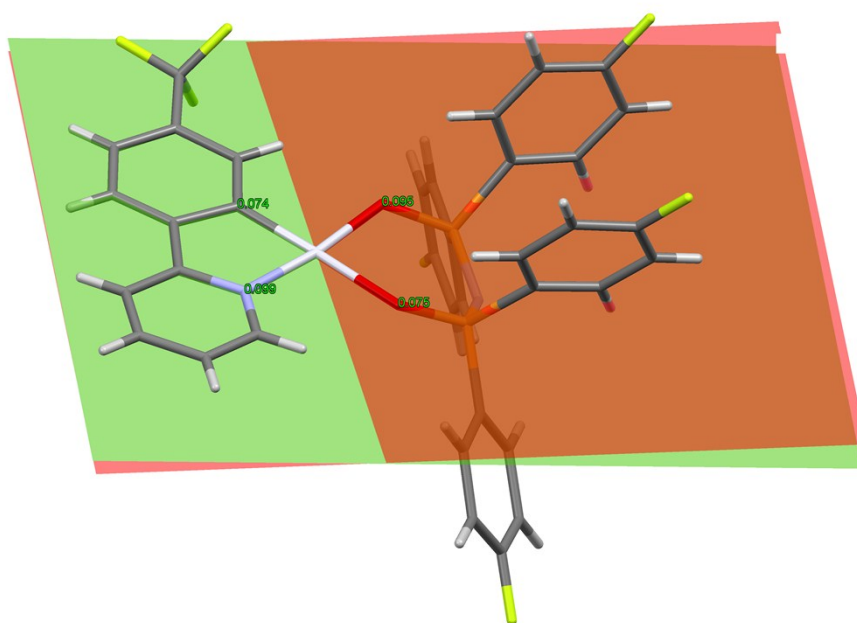

**Fig. S6** The atoms' displacement values from the mean plane of **Pt-ftpip**.

**Table S1.** Crystallographic data and structure refinement for complexes **Pt-tpip** and **Pt-ftpip**

|                                                                                                                | <b>Pt-tpip</b>                                                                                 | <b>Pt-ftpip</b>                                                                                |
|----------------------------------------------------------------------------------------------------------------|------------------------------------------------------------------------------------------------|------------------------------------------------------------------------------------------------|
| Formula                                                                                                        | C <sub>36</sub> H <sub>27</sub> F <sub>3</sub> N <sub>2</sub> O <sub>2</sub> P <sub>2</sub> Pt | C <sub>36</sub> H <sub>23</sub> F <sub>7</sub> N <sub>2</sub> O <sub>2</sub> P <sub>2</sub> Pt |
| FW                                                                                                             | 833.41                                                                                         | 905.41                                                                                         |
| T (K)                                                                                                          | 296(2)                                                                                         | 296(2)                                                                                         |
| Wavelength (Å)                                                                                                 | 0.71073                                                                                        | 0.71073                                                                                        |
| Cryst syst                                                                                                     | Triclinic                                                                                      | Monoclinic                                                                                     |
| Space group                                                                                                    | <i>P1</i>                                                                                      | <i>P2(1)/n</i>                                                                                 |
| <i>a</i> (Å)                                                                                                   | 11.1019(7)                                                                                     | 13.6958(14)                                                                                    |
| <i>b</i> (Å)                                                                                                   | 11.4751(8)                                                                                     | 11.3423(12)                                                                                    |
| <i>c</i> (Å)                                                                                                   | 14.0486(9)                                                                                     | 21.827(2)                                                                                      |
| $\alpha$ (deg)                                                                                                 | 77.9640(10)                                                                                    | 90                                                                                             |
| $\beta$ (deg)                                                                                                  | 81.1010(10)                                                                                    | 94.556(2)                                                                                      |
| $\gamma$ (deg)                                                                                                 | 89.9710(10)                                                                                    | 90                                                                                             |
| <i>V</i> (Å <sup>3</sup> )                                                                                     | 1728.4(2)                                                                                      | 3379.9(6)                                                                                      |
| <i>Z</i>                                                                                                       | 2                                                                                              | 27                                                                                             |
| $\rho_{\text{calcd}}$ (g/cm <sup>3</sup> )                                                                     | 1.550                                                                                          | 3.822                                                                                          |
| $\mu$ (Mo K $\alpha$ ) (mm <sup>-1</sup> )                                                                     | 4.200                                                                                          | 28.220                                                                                         |
| <i>F</i> (000)                                                                                                 | 762                                                                                            | 3348                                                                                           |
| Range of transm factors (deg)                                                                                  | 1.82-28.28                                                                                     | 1.70-27.52                                                                                     |
| Reflns collected                                                                                               | 12478                                                                                          | 22212                                                                                          |
| Unique                                                                                                         | 8470                                                                                           | 7743                                                                                           |
| GOF on <i>F</i> <sup>2</sup>                                                                                   | 1.376                                                                                          | 1.051                                                                                          |
| <i>R</i> <sub>1</sub> <sup>a</sup> , <i>wR</i> <sub>2</sub> <sup>b</sup> ( <i>I</i> > 2 $\sigma$ ( <i>I</i> )) | 0.0713, 0.1892                                                                                 | 0.0478, 0.1241                                                                                 |
| <i>R</i> <sub>1</sub> <sup>a</sup> , <i>wR</i> <sub>2</sub> <sup>b</sup> (all data)                            | 0.0740, 0.1909                                                                                 | 0.0638, 0.1326                                                                                 |
| CCDC NO.                                                                                                       | 1509840                                                                                        | 1509843                                                                                        |

$$R_1^a = \frac{\sum ||F_o| - |F_c||}{\sum F_o}, \quad wR_2^b = [\frac{\sum w(F_o^2 - F_c^2)^2}{\sum w(F_o^2)}]^{1/2}$$

**Table S2.** The table of selected bond lengths and angles of **Pt-tpip** and **Pt-ftpip**.

| <b>Pt-tpip</b>          |               | <b>Pt-ftpip</b> |               |
|-------------------------|---------------|-----------------|---------------|
| Selected bonds          |               |                 |               |
| Pt2-O4                  | 2.025(6)      | Pt1-C6          | 1.947(6)      |
| Pt2-O3                  | 2.135(6)      | Pt1-N1          | 1.980(5)      |
| Pt2-N2                  | 1.972(7)      | Pt1-O3          | 2.164(4)      |
| Pt2-C54                 | 1.939(7)      | Pt1-O4          | 2.030(4)      |
| P1-O4                   | 1.544(6)      | O4-P5           | 1.532(4)      |
| P7-O3                   | 1.542(5)      | O3-P4           | 1.515(5)      |
| P1-N3                   | 1.581(6)      | P5-N2           | 1.594(5)      |
| P7-N3                   | 1.595(7)      | P4-N2           | 1.591(5)      |
| Selected angels         |               |                 |               |
| C54-Pt2-N2              | 82.3(3)       | C6-Pt1-N1       | 82.0(2)       |
| N2-Pt2-O3               | 92.4(2)       | N1-Pt1-O3       | 93.47(19)     |
| O3-Pt2-O4               | 93.7(2)       | O3-Pt1-O4       | 92.42(17)     |
| O4-Pt2-C54              | 91.6(3)       | O4-Pt1-C6       | 92.0(2)       |
| Selected torsion angels |               |                 |               |
| C54-Pt2-N2-O3           | 177.411(256)  | C6-Pt1-N1-O3    | -177.934(211) |
| N2-Pt2-O3-O4            | -179.745(279) | N1-Pt1-O3-O4    | -177.259(183) |
| O3-Pt2-O4-C54           | 177.457(264)  | O3-Pt1-O4-C6    | -177.739(209) |

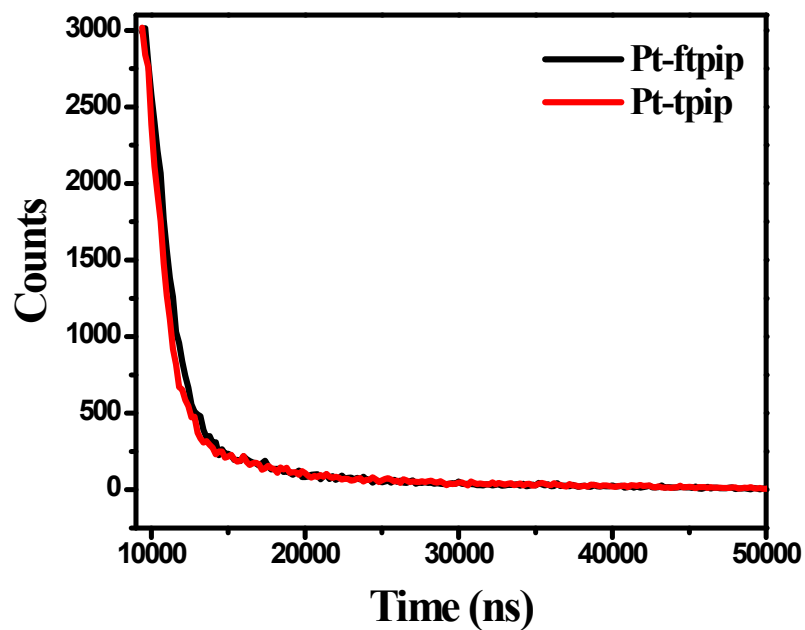

Fig. S7 The selected lifetime curves of Pt-tpip and Pt-ftpip in degassed  $\text{CH}_2\text{Cl}_2$  solution.

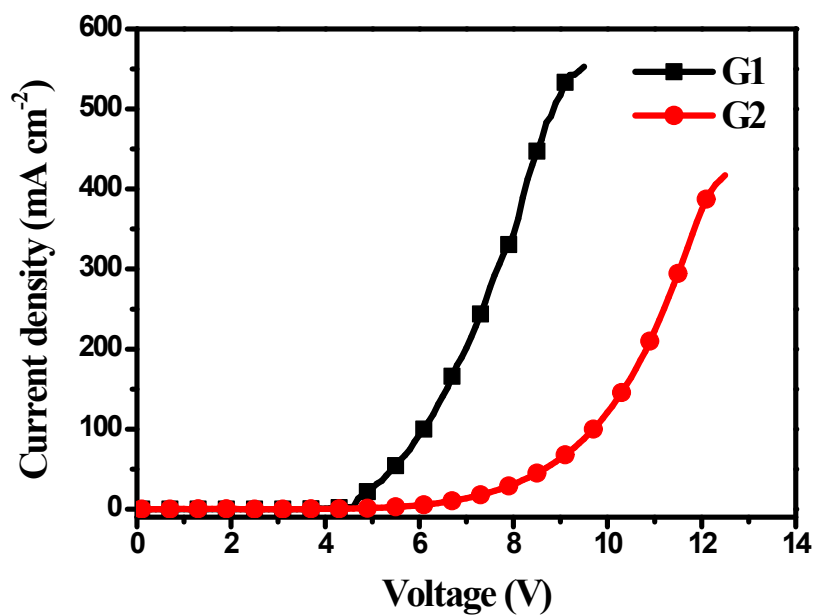

Fig. S8 The current density (J) versus voltage (V) curves for G1 and G2.
